# Supplementary material
Source: Springer Nature journal article supplement (https://www.springermedizin.de/resource/supplementary/13058_2013_3447_MOESM4_ESM.pdf/9704024)

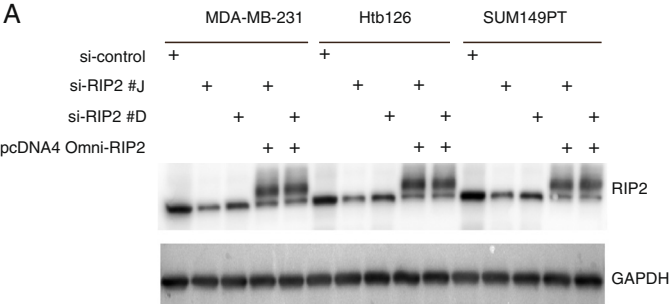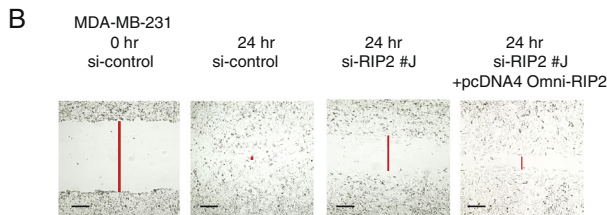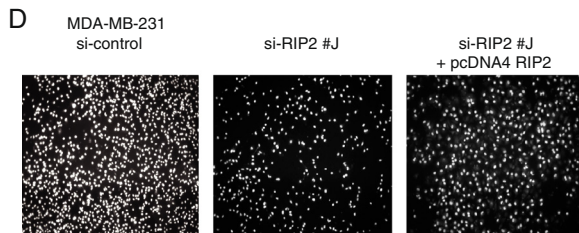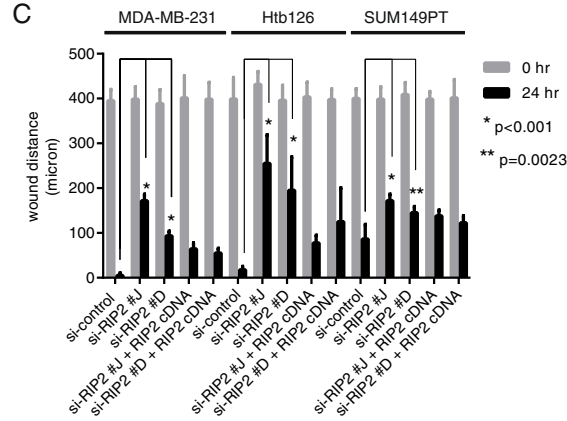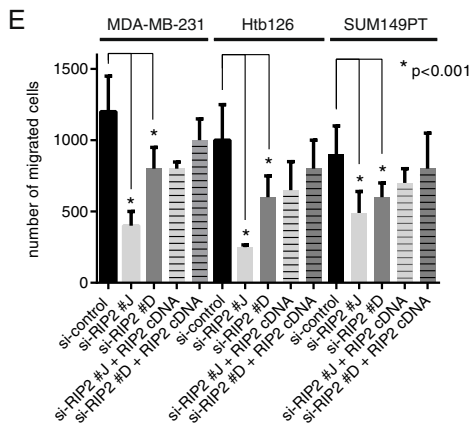

Supplement: MOESM4 [file 9704024]
